# Supplementary material for: SOD1 protein aggregates stimulate macropinocytosis in neurons to facilitate their propagation
Source: Springer Nature journal article supplement (doi:10.1186/s13024-015-0053-4), 2015-10-31
Supplement: MOESM1 [file 9776508]

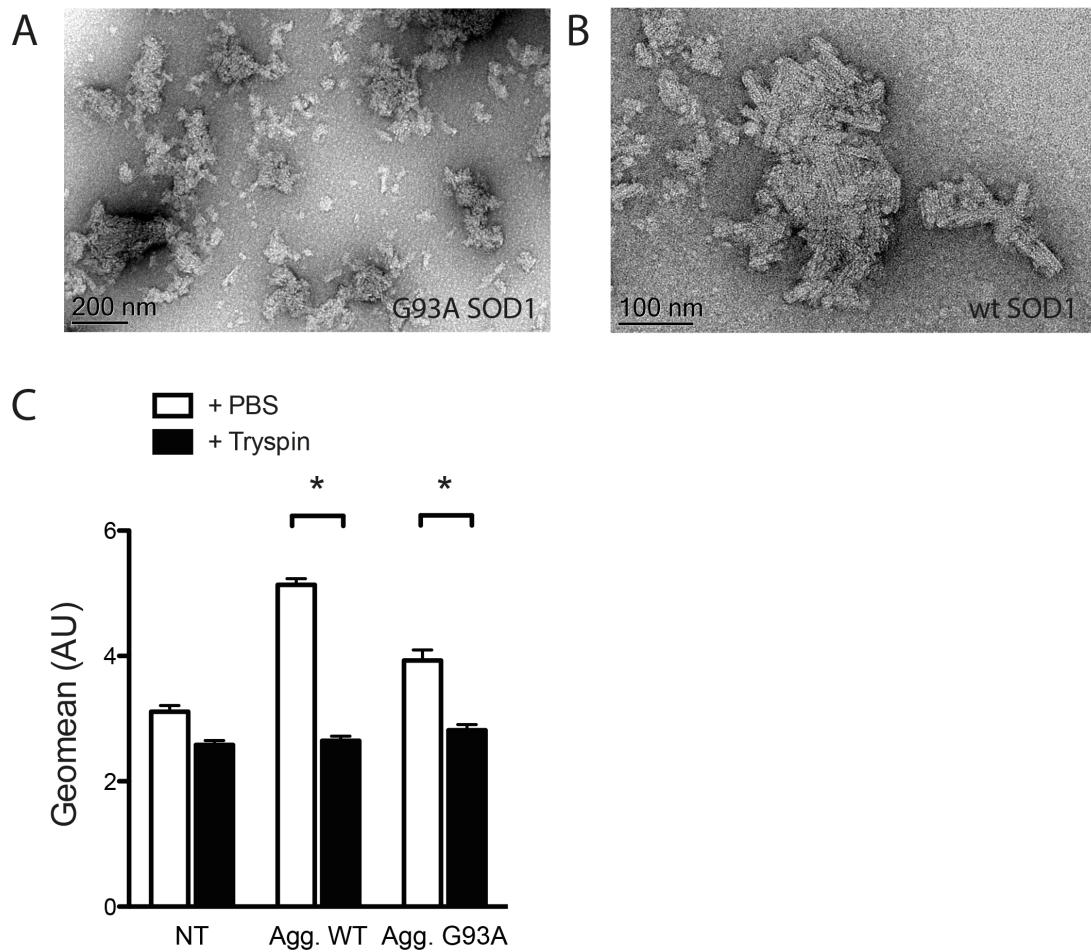

**Additional File 1. SOD1 aggregates in to fibril like structures that associate with cells via membrane proteins.** (A-B) Aggregation of purified wt and G93A SOD1. Representative TEM image of endpoint aggregates, scale bar are as indicated. (C) Internalization of aggregated wt and G93A SOD1 (20  $\mu$ g/mL) proteins for 30 min at 37°C, in the absence (control) or presence of a pre-incubation step with 0.05% trypsin for 10 min at 37°C. MFI of Alexa647-dextran uptake was measured using flow cytometry. Results shown as geometric means  $\pm$  SD, n =6, \* P <0.05.
