# Supplementary material for: SOD1 protein aggregates stimulate macropinocytosis in neurons to facilitate their propagation
Source: Springer Nature journal article supplement (doi:10.1186/s13024-015-0053-4), 2015-10-31
Supplement: MOESM2 [file 9776508]

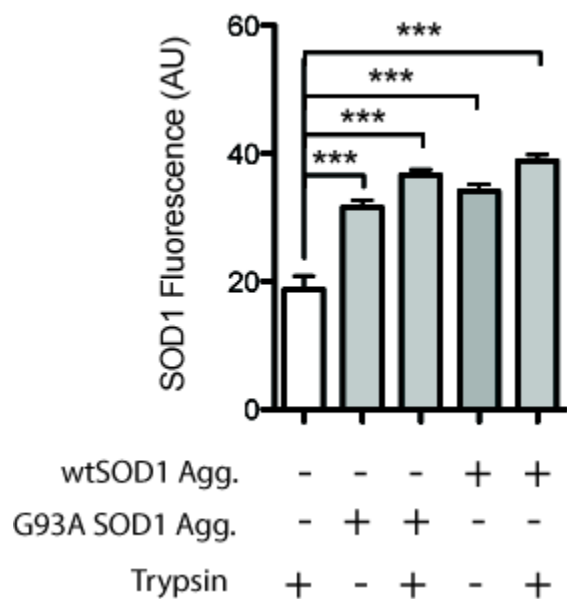

**Additional File 2. SOD1 aggregates are internalized in NSC-34 cells.** NSC34 Cells were incubated with 20  $\mu\text{g}/\text{mL}$  of HuWt and HuG93A SOD1 aggregates for 1 h at 37°C. Cells were incubated with trypsin (0.25%) or PBS for 5 min to remove surface-bound aggregates. The resulting detached cells were re-plated in media, and allowed to recover for 6 h at 37 °C before fixation for immunocytochemistry. Biotinylated SOD1 aggregates were detected using SA-alexa488. Results shown are mean cellular fluorescence means  $\pm$  SD,  $n > 30$ , \*\*\*  $P < 0.001$ .
