# Supplementary material for: SOD1 protein aggregates stimulate macropinocytosis in neurons to facilitate their propagation
Source: Springer Nature journal article supplement (doi:10.1186/s13024-015-0053-4), 2015-10-31
Supplement: MOESM6 [file 9776508]

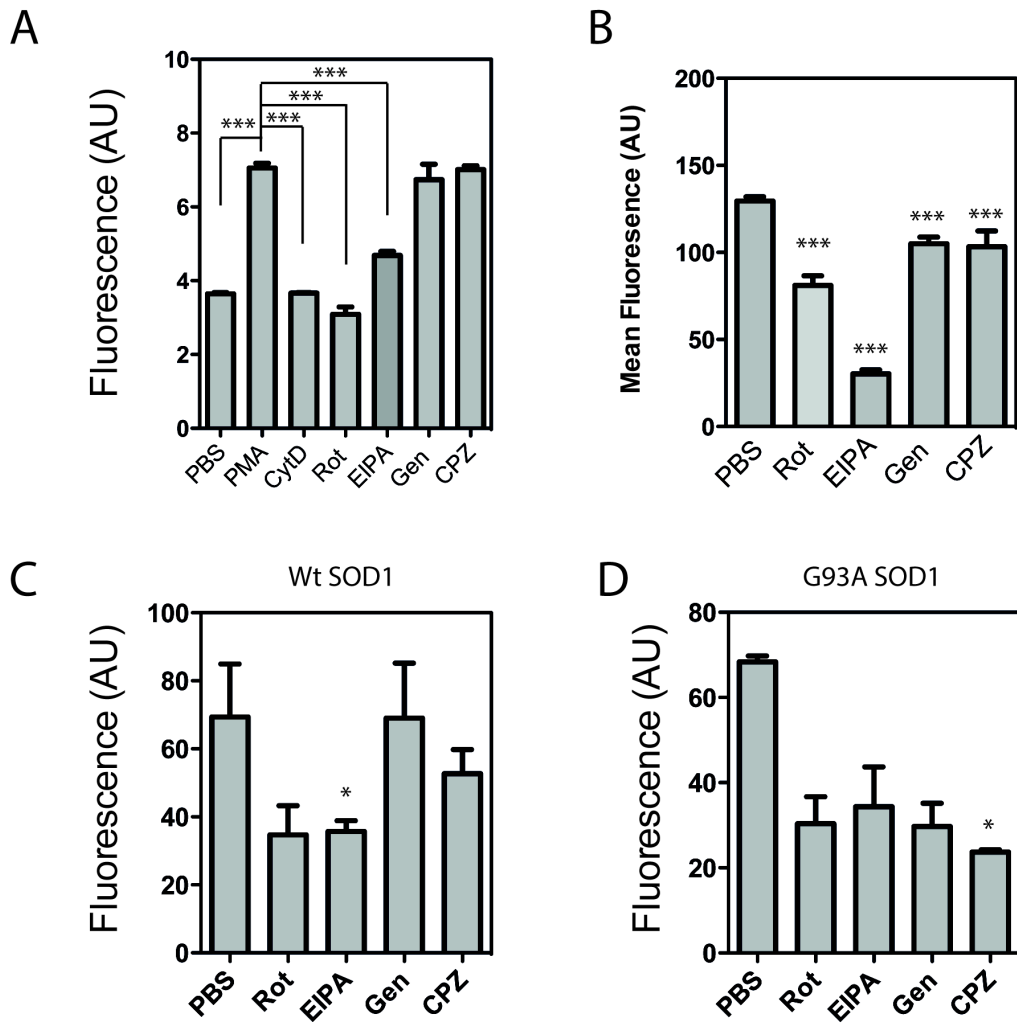

**Additional File 6. Small molecule inhibitors block macropinocytosis.** PMA induced dextran uptake is suppressed by inhibitors of macropinocytosis (A). The induction of fluid phase uptake was measured using fluorescently labelled dextran. NSC-34 cells were serum starved for 24 h and were pre-treated with either rottlerin (3  $\mu$ M), EIPA (100  $\mu$ M), genistein (10  $\mu$ M) and chlorpromazine hydrochloride (CPZ) (5 mM) for 30 min at 37°C, and then co-incubated with PMA (200 nM) for an additional 30 min at 37°C. Cells were subsequently incubated with 10 kDa Alexa647-dextran (0.5 mg/ml) for 15 min prior to fixation. MFI of Alexa647-dextran uptake was measured using flow cytometry. Results shown as means  $\pm$  SD, n = 6, \* p < 0.05. Aggregated wt SOD1 uptake is inhibited by EIPA and rottlerin (B). Internalization of aggregated wt SOD1 (20  $\mu$ g/mL) for 30 min at 37°C, in the absence (control) or presence of a pre-incubation step with either rottlerin (3  $\mu$ M), EIPA (100  $\mu$ M), genistein (10  $\mu$ M) or chlorpromazine hydrochloride (CPZ) (5 mM). Fixed and permeabilized cells were labeled with Alexa488 conjugated to SA and fluorescence measured using flow cytometry. Error bars represent SD and \*\*\* denotes p < 0.001. Differential inhibition of the cellular uptake of non-aggregated wt and G93A NSC-34 (C-D). Internalization of non-aggregated wt and G93A SOD1 (20  $\mu$ g/mL) for 30 min at 37°C, in the absence (PBS) or presence of a pre-incubation step with either rottlerin (3  $\mu$ M), EIPA (100  $\mu$ M), genistein (10  $\mu$ M) and chlorpromazine hydrochloride (CPZ) (5 mM). Fixed and permeabilized cells were probed with an anti-human SOD1 antibody conjugated Alexa488 and fluorescence measured using flow cytometry. Results shown as means  $\pm$  SD, n = 3, \* p < 0.05.
