# Supplementary material for: SOD1 protein aggregates stimulate macropinocytosis in neurons to facilitate their propagation
Source: Springer Nature journal article supplement (doi:10.1186/s13024-015-0053-4), 2015-10-31
Supplement: MOESM7 [file 9776508]

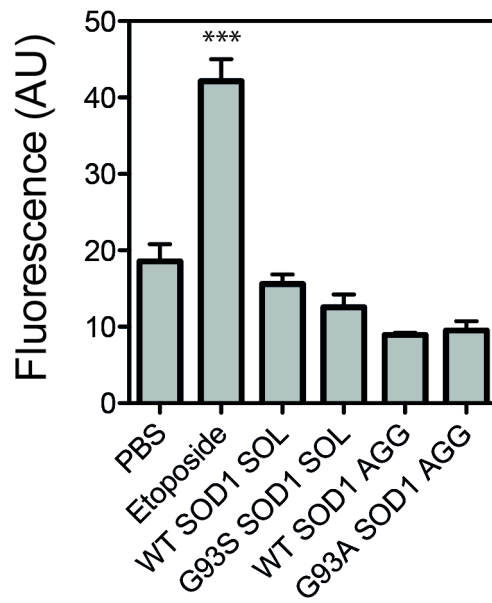

**Additional File 7. Addition of SOD1 does not induce rapid apoptosis.** Cells were incubated with soluble or aggregated forms of SOD1 for 2 h and then the levels of activated caspase-3 tested using Image-IT kit. While the levels of activated caspase-3 were increased in NSC-34 cells incubated overnight with etoposide, there was no increase in fluorescence of cells treated as described with any forms of SOD1. Results shown as means  $\pm$  SD, n = 3, \* p < 0.001.
