# Supplementary material for: SOD1 protein aggregates stimulate macropinocytosis in neurons to facilitate their propagation
Source: Springer Nature journal article supplement (doi:10.1186/s13024-015-0053-4), 2015-10-31
Supplement: MOESM8 [file 9776508]

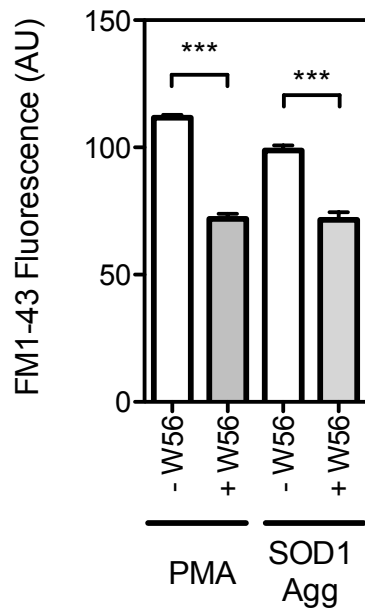

**Additional File 8. Rac1 activation is downstream of membrane ruffling.** Laser scanning confocal micrographs of SOD1 aggregate uptake in the presence or absence of W56 were used to calculate mean fluorescence per cell using ImageJ. NSC-34 cells were treated with PMA or SOD1 aggregates in the presence or absence of Rac1 inhibitor W56 and then examined for membrane perturbations using membrane dye FM1-43FX. Both PMA and aggregate treated cells showed reduced membrane perturbation in the presence of W56. Data are mean fluorescence intensity per cell of a minimum of 100 cells  $\pm$  SD, \*\*\*  $p < 0.001$ .
