# Supplementary material for: SOD1 protein aggregates stimulate macropinocytosis in neurons to facilitate their propagation
Source: Springer Nature journal article supplement (doi:10.1186/s13024-015-0053-4), 2015-10-31
Supplement: MOESM9 [file 9776508]

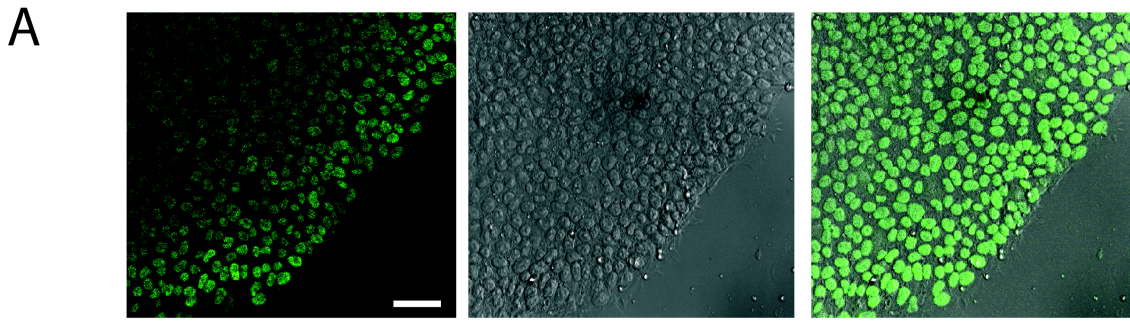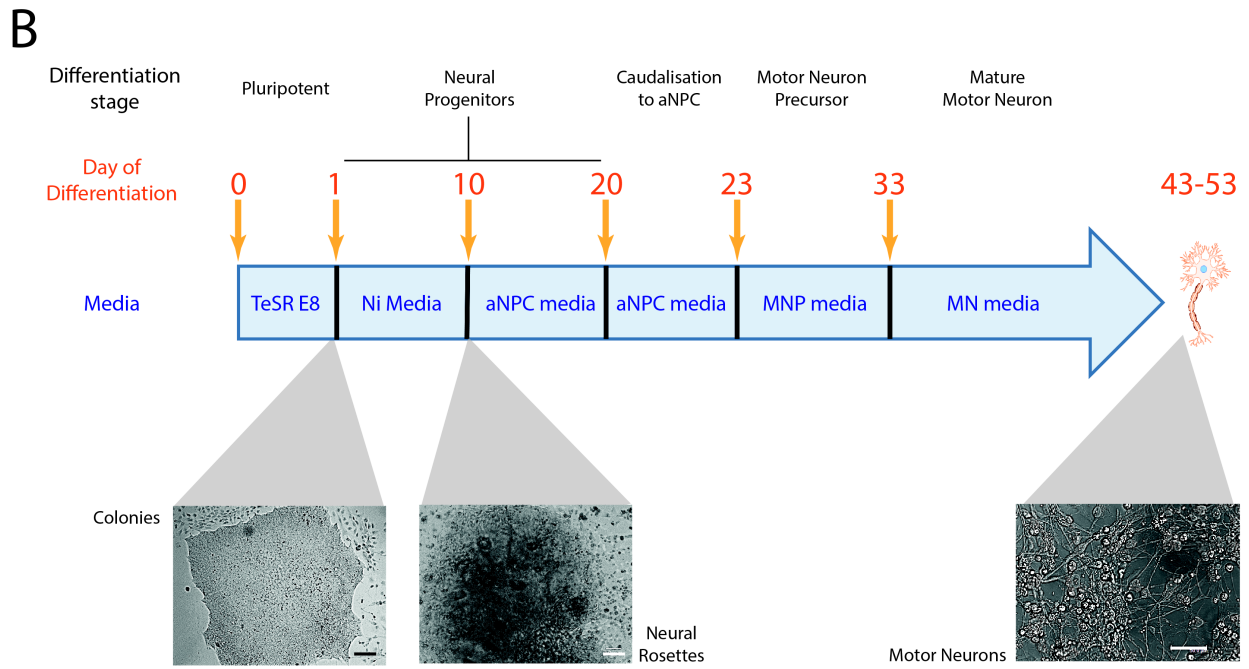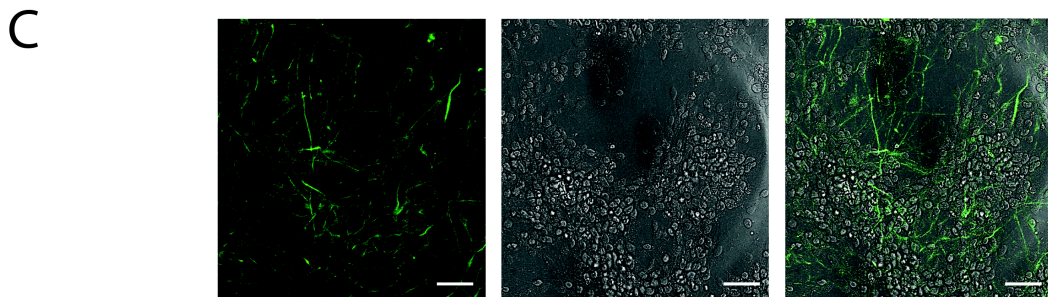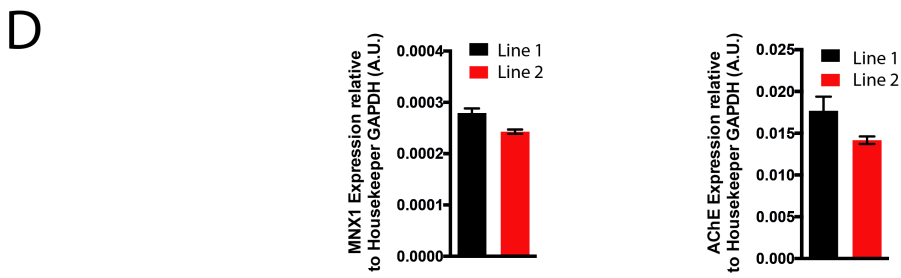

**Additional File 9. Characterization of iPSC derived motor neurons.** (A) Immunocytochemistry confirmed the expression of the pluripotency marker Oct4. Human induced pluripotent stem cells were cultured in TeSR-E8 on glass coverslips coated with Matrigel, fixed and stained with Alexa Fluor 488-conjugated Oct4 antibody. Confocal and brightfield images were taken on a Leica SP5 confocal microscope. Scale bar is 60  $\mu$ m. (B) The timeline summarises the differentiation stages and the growth factor conditions used during differentiation (Billican et al.). Example images of cellular morphological changes during differentiation are shown. Scale bars are 100  $\mu$ m, 50  $\mu$ m, 50  $\mu$ m respectively. (C) Motor neurons were cultured on glass coverslips coated with laminin, collagen and fibronectin. Immunocytochemistry confirmed the expression of the motor neuron marker SMI-32. Scale bars are 30  $\mu$ m. (D) Expression of neuronal and cholinergic markers were quantified using quantitative RT-PCR. Data plotted as mean relative gene expression in motor neurons normalised to *GAPDH* ( $\pm$  SEM, n=3). *MNX1* and *ACHE* expression was silent in pluripotent cells.
