# Supplementary material for: SOD1 protein aggregates stimulate macropinocytosis in neurons to facilitate their propagation
Source: Springer Nature journal article supplement (doi:10.1186/s13024-015-0053-4), 2015-10-31
Supplement: MOESM10 [file 9776508]

A

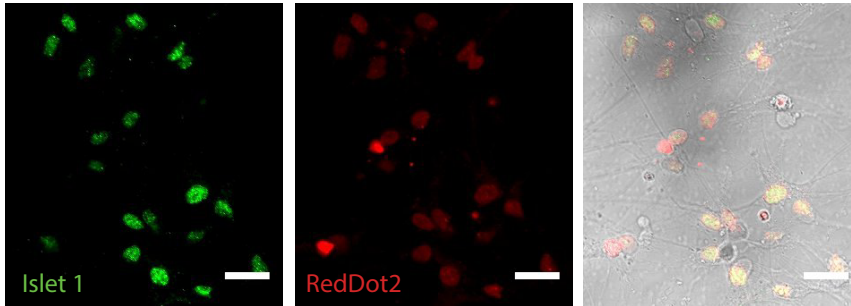

B

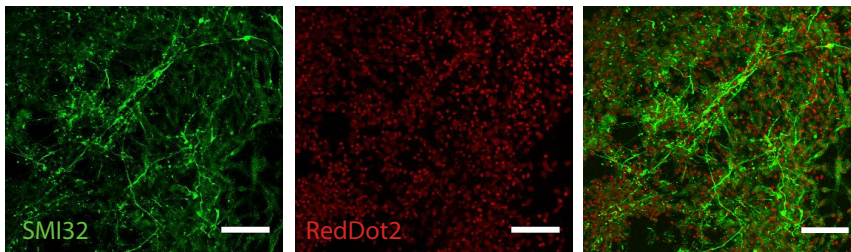

**Additional File 10. Characterization of iPSC derived motor neurons.** Quantification of Islet 1 (A) and SMI32 (B) positive cells was performed using immunocytochemistry and analysis using Image J software. Islet 1 and SMI32 positive cells were calculated as a percentage of the total number of cells (determined by nuclear stain) from motor neuron cultures generated from six donor cell lines, using 6-10 images from each technical replicate (separate differentiation experiments using 3 technical replicates for Islet 1 and 2 technical replicates for SMI32). The motor neuron cultures contained  $90.5 \pm 1.4$  % SMI32-positive cells and  $88.8 \pm 1.4$  % Islet 1-positive cells.
