# Supplementary material for: SOD1 protein aggregates stimulate macropinocytosis in neurons to facilitate their propagation
Source: Springer Nature journal article supplement (doi:10.1186/s13024-015-0053-4), 2015-10-31
Supplement: MOESM12 [file 9776508]

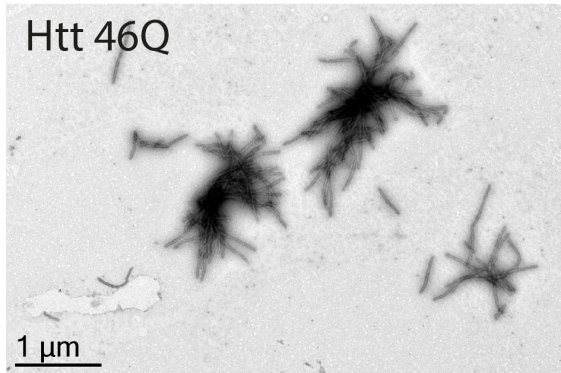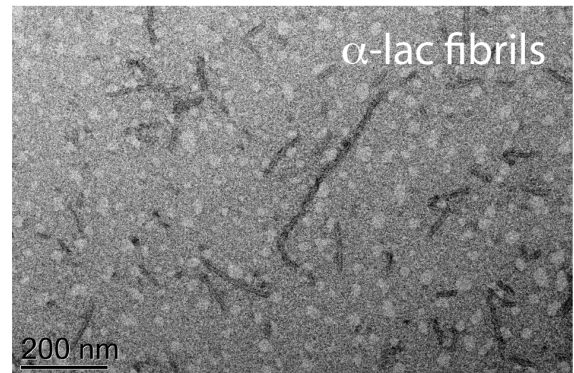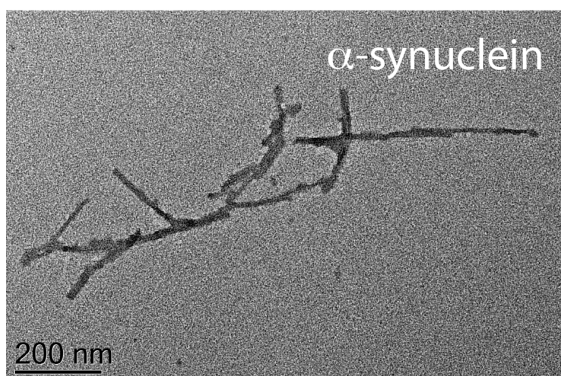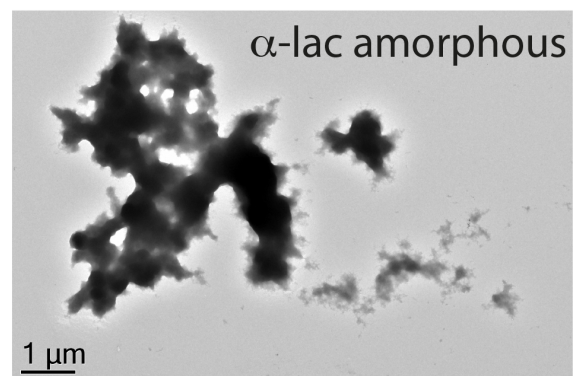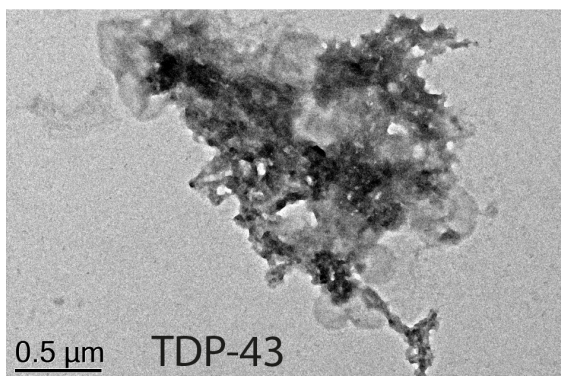

**Additional File 12. Morphology of protein aggregates using TEM.** Aggregation of purified TDP-43, Htt<sub>ex1</sub>-46Q,  $\alpha$ -synuclein,  $\alpha$ -lactalbumin showing amorphous and fibrillar aggregates. Representative TEM image of endpoint aggregates negatively stained with uranyl acetate, scale bars are as indicated.
